# Supplementary material
Source: PubMed Central journal article supplement (PMC7959937)
Supplement: 15-00343.pdf [file 15-00343.pdf]

**On-line Table 1: Excluded studies after article examination with reasons**

| Studies                               | Reasons                                              |
|---------------------------------------|------------------------------------------------------|
| Atri et al, 2005 <sup>48</sup>        | Mixed group (dementia)                               |
| Brundel et al, 2012 <sup>39</sup>     | Mixed group (AD/MCI)                                 |
| Gurol et al, 2013 <sup>49</sup>       | Mixed group (AD/MCI)                                 |
| Danve et al, 2014 <sup>50</sup>       | Case series/no prevalence reported                   |
| Ghostine et al, 2009 <sup>51</sup>    | Case report                                          |
| Goos et al, 2009 <sup>8</sup>         | Case control cross-sectional study                   |
| Henneman et al, 2009 <sup>52</sup>    | No prevalence reported                               |
| Heringa et al, 2014 <sup>2</sup>      | Mixed group (AD/aMCI)                                |
| Hilal et al, 2014 <sup>53</sup>       | Mixed group (CIND/dementia)                          |
| Kimberly et al, 2009 <sup>54</sup>    | Mixed group (AD/MCI)                                 |
| Ku and Chi, 2011 <sup>55</sup>        | No empiric data/review/hypothesis                    |
| Kuijf et al, 2013 <sup>56</sup>       | Mixed group (dementia)                               |
| Li et al, 2013 <sup>57</sup>          | Mixed group (AD sporadic and familial)               |
| Pettersen et al, 2008 <sup>36</sup>   | Case control                                         |
| Shams et al, 2015 <sup>25,26</sup>    | Included atypical AD                                 |
| van Assema et al, 2012 <sup>58</sup>  | Cross-sectional (comparing AD+MBs with AD)           |
| van Rooden et al, 2014 <sup>59</sup>  | No prevalence reported                               |
| van Veluw et al, 2014 <sup>60</sup>   | Mixed group (AD/MCI)                                 |
| Vidal et al, 2010 <sup>61</sup>       | No prevalence/mixed group (dementia)                 |
| Wollenweber et al, 2014 <sup>62</sup> | Mixed group (dementia)                               |
| Yates et al, 2011 <sup>63</sup>       | Double data with Yeats et al, 2014 <sup>63</sup>     |
| Yokoyama et al, 2014 <sup>64</sup>    | No prevalence reported/not specific to MB prevalence |

**Note:**—CIND indicates cognitive impairment no dementia; aMCI, amnesic MCI.

**On-line Table 2: Demographic representation of the studies meeting selection criteria (n = 16 studies, provided 17 prevalence)**

| Studies                                  | Mean Age AD (SD) (yr) | Global Cognition   | % Male AD | AD Diagnosis (Possible/Probable)                  | Immunotherapy/ApoE-ε4/Antiplatelet | Hypertension, Explicitly Controlled, Yes/No (%) | Quality (of 21) |
|------------------------------------------|-----------------------|--------------------|-----------|---------------------------------------------------|------------------------------------|-------------------------------------------------|-----------------|
| Benedictus et al, 2013 <sup>28</sup>     | 67 (9)                | MMSE = 20.3 (5.1)  | 45        | McKhann et al, 1984 <sup>23</sup> (probable)      | NR/yes/NR                          | Yes (35)                                        | 20              |
|                                          | 75 (8)                | MMSE = 20.6 (4.5)  |           |                                                   |                                    |                                                 |                 |
|                                          | 68 (9)                | MMSE = 19.3 (5.3)  |           |                                                   |                                    |                                                 |                 |
|                                          | 74 (10)               | MMSE = 20.6 (3.7)  |           |                                                   |                                    |                                                 |                 |
| Cordonnier et al, 2006 <sup>7</sup>      | 70 (9)                | MMSEa = 20 (6)     | 40        | McKhann et al, 1984 <sup>23</sup> (NS)            | NR/yes/NR                          | Yes (34)                                        | 19              |
| Fukui et al, 2013 <sup>21,a</sup>        | 79.5 (5.4)            | NA                 | 47        | McKhann et al, 1984 <sup>23</sup> (NS)            | NR/NR/yes                          |                                                 | 18              |
| Goos et al, 2011 <sup>22</sup>           | NS                    | NS                 | NS        | Not reported                                      | NR/yes/yes                         | Yes (59)                                        | 18              |
| Kester et al, 2014 <sup>29,a</sup>       | 67 (8)                | MMSEa: 21 (5)      | 46        | McKhann et al, 1984 <sup>23</sup> (probable)      | NR/yes/NR                          |                                                 | 19              |
| Kirsch et al, 2009 <sup>4</sup>          | 78.9 (NR)             | NA                 | 46        | Typical AD (NR)                                   | NR/NR/NR                           | No                                              | 21              |
| Nagasawa et al, 2014 <sup>20</sup>       | 78.4 (7.7)            | MMSEa = 20.2 (4.1) | 43        | DSM-IV and McKhann et al, 1984 <sup>23</sup> (NS) | NR/NR/yes                          | Yes (36)                                        | 17              |
| Nagata et al, 2012 <sup>40</sup>         | 75.6 (NR)             | NA                 | 34        | McKhann et al, 1984 <sup>23</sup> (probable)      | NR/yes/NR                          | No                                              | 20              |
| Nakada-Kudo et al, 2006 <sup>41,b</sup>  | 74.3 (7.7)            | MMSEw = 19.3 (5.4) | 29        | DSM-IV and                                        | NR/NR/yes                          | Yes (45)                                        | 18              |
|                                          | 74.5 (8.2)            | MMSEb = 21.3 (3.8) |           |                                                   |                                    |                                                 |                 |
| Par-k et al, 2013 <sup>42</sup>          | 67.3 (8.9)            | NA                 | 45        | McKhann et al, 1984 <sup>23</sup> (mixed)         | NR/yes/NR                          | Yes (43)                                        | 20              |
|                                          | 76.6 (5.9)            |                    |           |                                                   |                                    |                                                 |                 |
| Qiu et al, 2010 <sup>43</sup>            | NA                    | NA                 | NA        | McKhann et al, 1984 <sup>23</sup> (mixed)         | NR/NR/NR                           | Yes (cannot tell)                               | 19              |
| Staeckenborg et al, 2009 <sup>44</sup>   | 72 (7)                | MMSEa 26 (2)       | 41        | McKhann et al, 1984 <sup>23</sup> (NS)            | NR/NR/NR                           | No                                              | 21              |
| Uetani et al, 2013 <sup>24</sup>         | 75 (9)                | MMSEa = 20 (4)     | 33        | McKhann et al, 1984 <sup>23</sup> (probable)      | NR/NR/NR                           | Yes (41)                                        | 20              |
| van der Vlies, et al, 2012 <sup>45</sup> | 68 (9)                | MMSEa = 22 (4)     | 51        | McKhann et al, 1984 <sup>23</sup> (probable)      | NR/yes/cannot tell                 | Yes (31)                                        | 20              |
| Yates et al, 2014 <sup>46,b</sup>        | 74.6 (8.4)            | MMSEa = 21.4 (5.2) | 40        | McKhann et al, 1984 <sup>23</sup> (NS)            | NR/yes/yes                         | No                                              | 21              |
| Zonneveld et al, 2014 <sup>47</sup>      | 68 (9)                | MMSEa = 21 (5)     | 47        | McKhann et al, 1984 <sup>23</sup> (probable)      | NR/yes/yes                         | No                                              | 21              |
| Postupdate                               |                       |                    |           |                                                   |                                    |                                                 |                 |
| Olazarán et al, 2014 <sup>27</sup>       | NS                    | NR                 | NS        | NR                                                | NR/NS/NS                           | Yes (NS)                                        | 16              |

**Note:**—NA indicates not assessed or appropriate for the study; NR, examined but not reported; NS, not specified; ApoE ε4, apolipoprotein ε4; DSM-IV, Diagnostic and Statistical Manual of Mental Disorders, 4th Edition; MMSEb, Mini-Mental State Examination for microbleeds; MMSEw, without microbleeds; MMSEa, all of the AD sample.

<sup>a</sup> Studies are excluded, given a mixed technique or specific imaging variables of interest not reported.

<sup>b</sup> Reported duplicate data with excluded studies.

**On-line Table 3: MB prevalence change in AD as a function of moderating variable (total n = 14 studies with 15 reported prevalence)**

| Variables                       | Effect Size and 95% CI |                | Heterogeneity  |             |             |         |        |         |                |
|---------------------------------|------------------------|----------------|----------------|-------------|-------------|---------|--------|---------|----------------|
|                                 | Subvariables           | No. of Outcome | Point Estimate | Lower Limit | Upper Limit | Q-Value | df (Q) | P Value | I <sup>2</sup> |
| All studies                     | —                      | 15             | 0.2408         | 0.1931      | 0.2959      | 99.9880 | 14     | <.001   | 85.9983        |
| AD diagnosis                    | (Probable/possible)    | 2              | 0.1418         | 0.0912      | 0.2138      | 0.3529  | 1      | .5525   | 0.0000         |
|                                 | NS                     | 6              | 0.2349         | 0.1712      | 0.3133      | 19.9814 | 5      | .0013   | 74.9767        |
| MB location                     | Probable               | 7              | 0.2712         | 0.1943      | 0.3648      | 62.5353 | 6      | <.001   | 90.4054        |
|                                 | Cortical               | 1              | 0.3300         | 0.2744      | 0.3908      | 0.0000  | 0      | 1.0000  | 0.0000         |
|                                 | Global/diffuse         | 11             | 0.2434         | 0.1873      | 0.3098      | 79.8028 | 10     | <.001   | 87.4691        |
| MBs definition                  | NR                     | 1              | 0.1750         | 0.1170      | 0.2536      | 0.0000  | 0      | 1.0000  | 0.0000         |
|                                 | Subcortical            | 2              | 0.2000         | 0.0402      | 0.5989      | 8.7265  | 1      | .0031   | 88.5407        |
|                                 | <10                    | 13             | 0.2515         | 0.1989      | 0.3126      | 93.4492 | 12     | <.001   | 87.1588        |
| ApoE-ε4 carrier status reported | NS                     | 2              | 0.1730         | 0.1222      | 0.2391      | 0.0139  | 1      | .9061   | 0.0000         |
|                                 | Mixed groups           | 2              | 0.2944         | 0.1377      | 0.5215      | 4.5254  | 1      | .0334   | 77.9024        |
| Infarct-lacunae                 | NR                     | 6              | 0.2301         | 0.1361      | 0.3617      | 56.0636 | 5      | <.001   | 91.0816        |
|                                 | Yes                    | 7              | 0.2306         | 0.1766      | 0.2951      | 35.1571 | 6      | <.001   | 82.9338        |
| Hemorrhage                      | Not specified          | 10             | 0.2397         | 0.1959      | 0.2899      | 33.3352 | 9      | .0001   | 73.0015        |
|                                 | Yes                    | 5              | 0.2277         | 0.1285      | 0.3710      | 52.6506 | 4      | <.001   | 92.4027        |
| Stroke                          | NR                     | 14             | 0.2396         | 0.1851      | 0.3041      | 98.5704 | 13     | <.001   | 86.8115        |
|                                 | Yes                    | 1              | 0.2400         | 0.2061      | 0.2775      | 0.0000  | 0      | 1.0000  | 0.0000         |
| Scanner                         | Exclusionary           | 1              | 0.4250         | 0.2831      | 0.5804      | 0.0000  | 0      | 1.0000  | 0.0000         |
|                                 | NR                     | 14             | 0.2310         | 0.1839      | 0.2860      | 94.4054 | 13     | <.001   | 86.2296        |
|                                 | GE Healthcare          | 3              | 0.2454         | 0.1681      | 0.3438      | 12.6218 | 2      | .0018   | 84.1544        |
| Techniques                      | Philips                | 2              | 0.1491         | 0.0977      | 0.2209      | 0.1640  | 1      | .6855   | 0.0000         |
|                                 | Siemens                | 8              | 0.2732         | 0.1782      | 0.3945      | 70.4237 | 7      | <.001   | 90.0602        |
|                                 | Unknown                | 2              | 0.2156         | 0.1593      | 0.2850      | 2.3392  | 1      | .1262   | 57.2510        |
|                                 | EPI                    | 3              | 0.1918         | 0.1220      | 0.2884      | 9.2877  | 2      | .0096   | 78.4661        |
| Postupdate                      | GRE                    | 7              | 0.1830         | 0.1486      | 0.2233      | 12.6674 | 6      | 0.0486  | 52.6345        |
|                                 | SWI                    | 5              | 0.4014         | 0.3299      | 0.4774      | 9.4008  | 4      | .0518   | 57.4505        |
| All studies                     | —                      | 16             | 0.249          | 0.202       | 0.304       | 106.500 | 15     | <.001   | 85.916         |
| AD diagnosis                    | Probable               | 8              | 0.281          | 0.209       | 0.366       | 64.0459 | 7      | <.001   | 89.073         |
| Scanner                         | GE Healthcare          | 4              | 0.276          | 0.201       | 0.366       | 16.970  | 3      | .0007   | 82.322         |
| Techniques                      | EPI                    | 4              | 0.232          | 0.152       | 0.336       | 18.328  | 3      | <.001   | 83.631         |
| MB definition                   | <10                    | 14             | 0.261          | 0.209       | 0.320       | 99.307  | 13     | <.001   | 86.909         |
| MB location                     | Global                 | 12             | 0.254          | 0.199       | 0.320       | 86.750  | 11     | <.001   | 87.320         |
| Section orientation             | Axial                  | 14             | 0.254          | 0.198       | 0.320       | 102.008 | 13     | <.001   | 87.256         |

**Note:**—NS indicates not specified; NR, not reported.

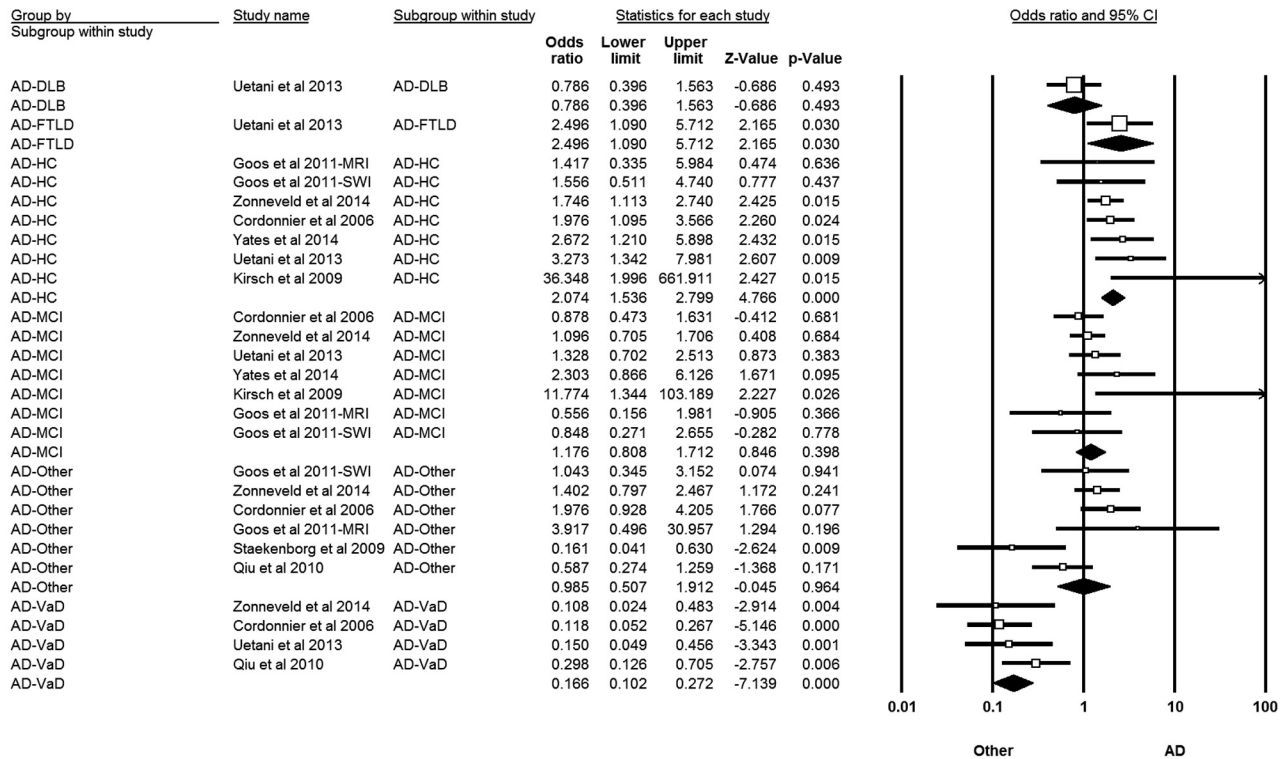

**ON-LINE FIG 1.** MB comparison between AD and other dementia. The *hollow squares* show the prevalence difference in magnitude with attached confidence interval bars for each study; the *bold diamonds* represent the aggregate differences for each group of dementia comparisons. HC indicates healthy control/subjective cognitive impairment; Other, mixed dementias; DLB, Lewy body dementia; FTLD, frontotemporal lobar dementia; VaD, vascular dementia.

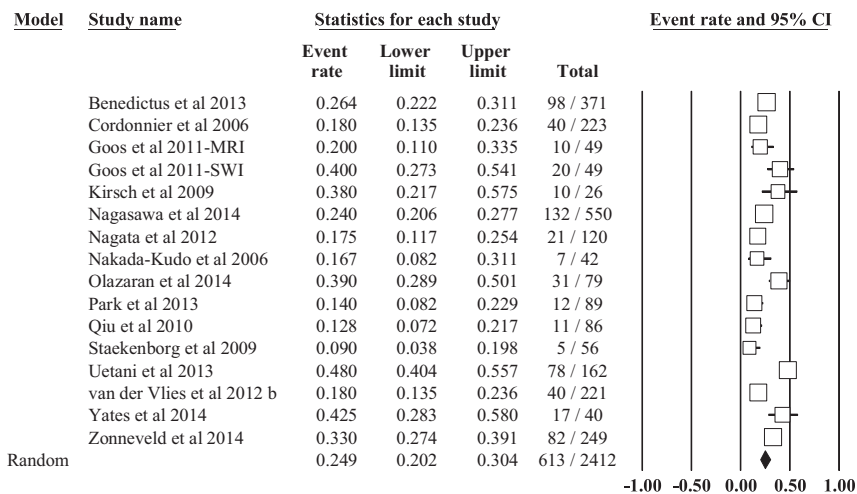

**ON-LINE FIG 2.** The forest plot shows the aggregate event rate estimate. The *hollow square* with attached 95% confidence interval shows the prevalence estimate for each study; the *bold diamond* represents the aggregate prevalence estimate.
